# Supplementary material for: Enzymatically generated long polyT-templated copper nanoparticles for versatile biosensing assay of DNA-related enzyme activity
Source: Royal Society of Chemistry journal article supplement (doi:10.1039/c5ay00423c), 2015-01-01
Supplement: c5ay00423c1.pdf [file c5ay00423c1.pdf]

## Supplementary materials

# Enzymatically-generated long polyT Templated-Copper Nanoparticles for Versatile Biosensing Assay of DNA-related Enzymes Activity

*Feifei Peng, Zhuoliang Liu, Wang Li\*, Yan Huang\*, Zhou Nie, Shouzhuo Yao*

State Key Laboratory of Chemo/Biosensing and Chemometrics, College of Chemistry and

Chemical Engineering, Hunan University, Changsha, 410082, P. R. China

\*Corresponding author. Tel.: +86-731-88821626; Fax: +86-731-88821848

E-mail: wli@hnu.edu.cn (W.L.), huangyan.hnu@gmail.com

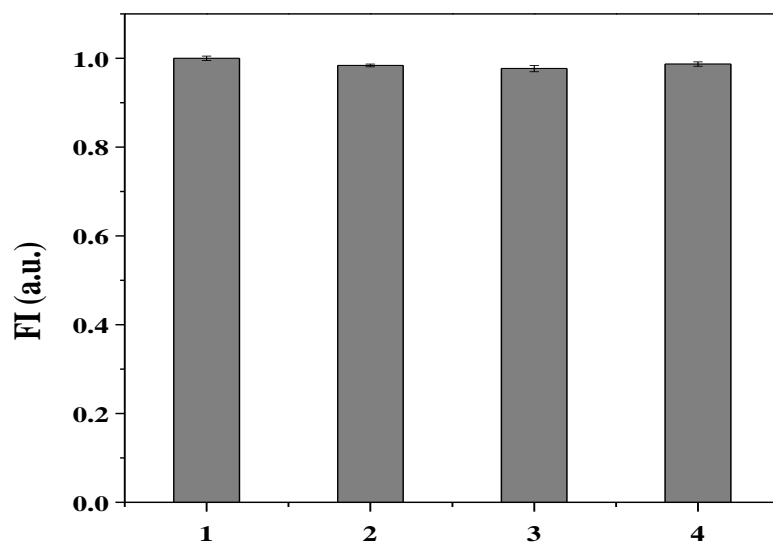

**Figure S1.** Fluorescence responses at 625 nm of DNA-CuNPs templated by  $1\mu\text{M T}_{40}$  (1) or (1) with TdT buffer (2), 1 mM dTTP (3), or 400 U/mL TdT (4).

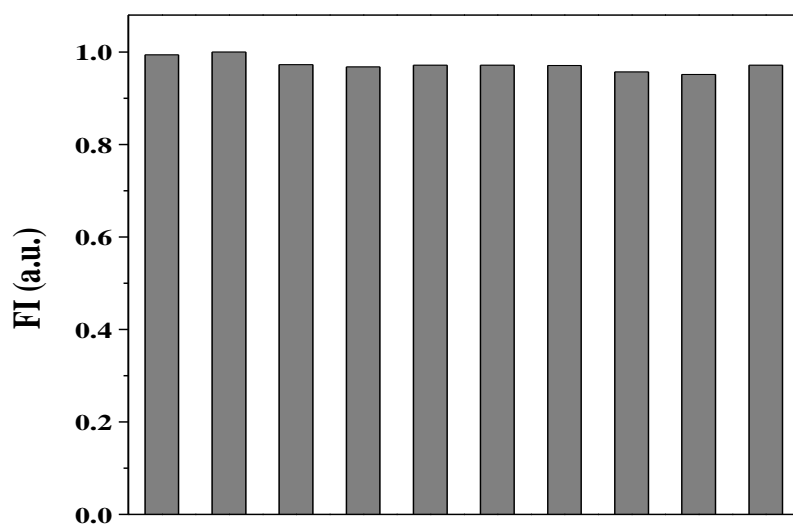

**Figure S2.** Detection of repeatability of DNA-CuNPs as biosensor involving ten samples in the presence of 400 U/mL TdT.

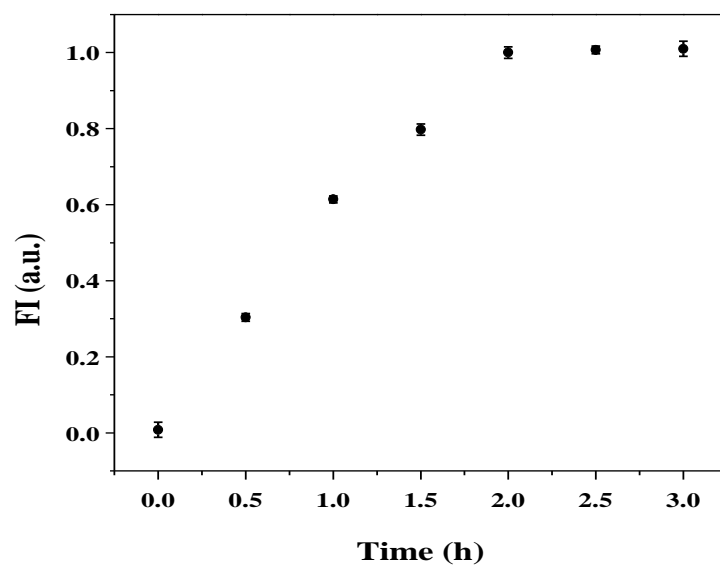

**Figure S3.** Influence of polymerization time on the formation of fluorescent CuNPs in the presence of 1  $\mu\text{M}$  DNA-P records at  $\lambda_{\text{em}} = 625$  nm.

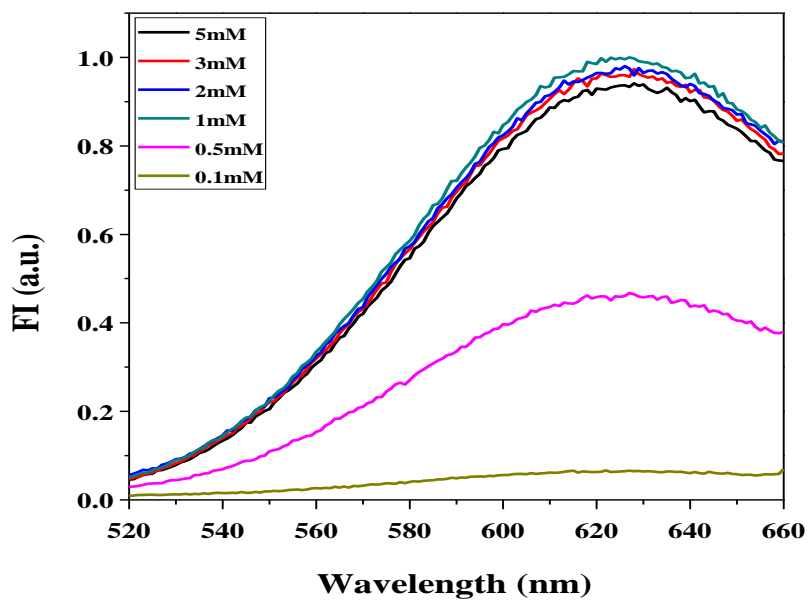

**Figure S4.** Influence of dTTP concentration on the formation of fluorescent CuNPs in the presence of 1  $\mu\text{M}$  DNA-P records at  $\lambda_{\text{em}} = 625$  nm.

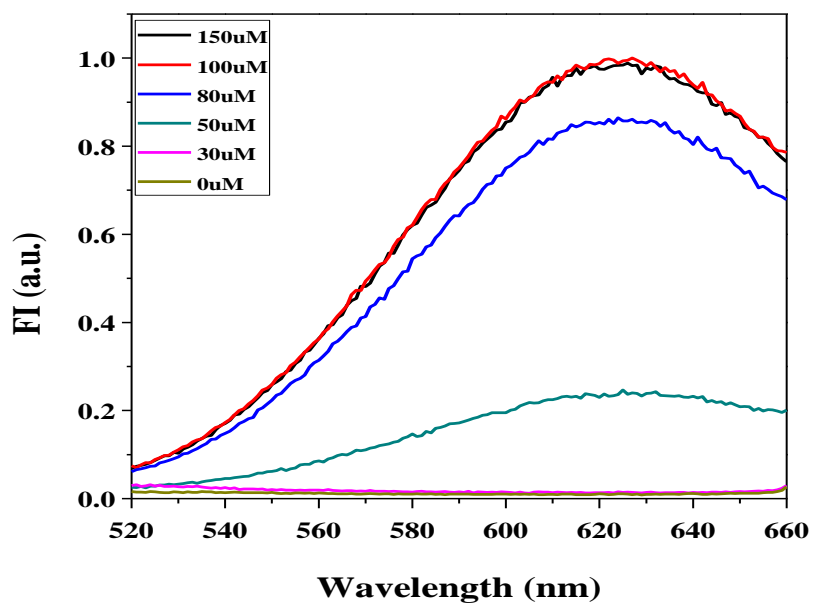

**Figure S5.** Influence of Cu<sup>2+</sup> concentration on the formation of fluorescent CuNPs in the presence of 1  $\mu$ M DNA-P records at  $\lambda_{em} = 625$  nm.

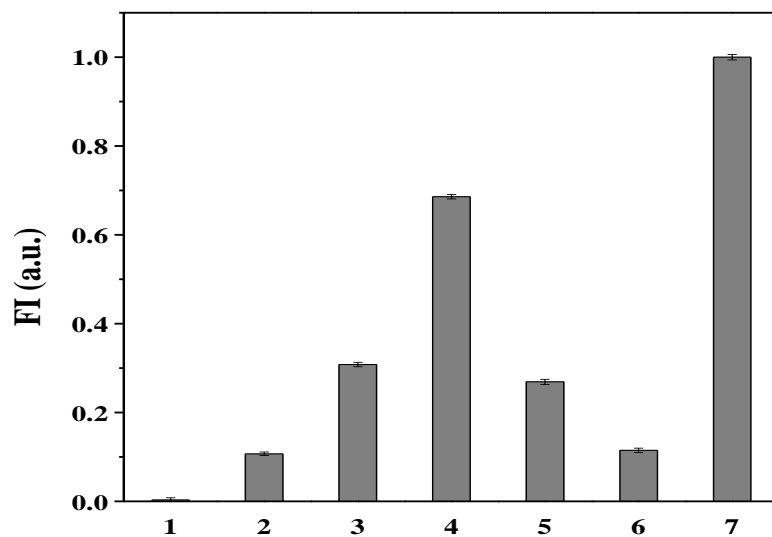

**Figure S6.** Fluorescence spectra of DNA-CuNPs synthesized by  $T_{40}$  of 0  $\mu\text{M}$  (1), 0.1  $\mu\text{M}$  (2), 1  $\mu\text{M}$  (3), 2  $\mu\text{M}$  (4), 4  $\mu\text{M}$  (5), 6  $\mu\text{M}$  (6) and by 0.1  $\mu\text{M}$  TdT-generated DNA-P-polyT (7).

**A**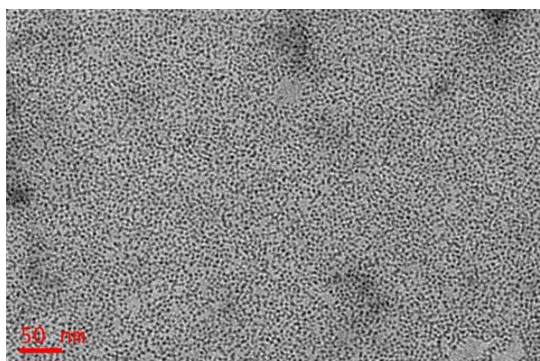**B**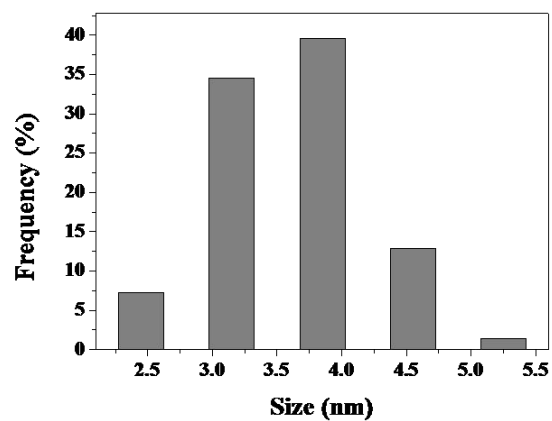

**Figure S7.** (A) TEM characterization of DNA-CuNPs templated by T<sub>40</sub>. And (B) DNA-CuNPs diameters supported by T<sub>40</sub>.



**Table S1.** Measurement results of TdT in complex biological medium.

| Number | Added/U | Found/U | Recovery/% | RSD/% |
|--------|---------|---------|------------|-------|
| 1      | 1       | 0.92    | 92.11      | 3.49  |
| 2      | 1.5     | 1.41    | 93.56      | 1.78  |
| 3      | 2       | 1.81    | 90.67      | 2.34  |
| 4      | 3       | 2.79    | 93.31      | 3.25  |
| 5      | 4       | 3.75    | 93.08      | 1.76  |

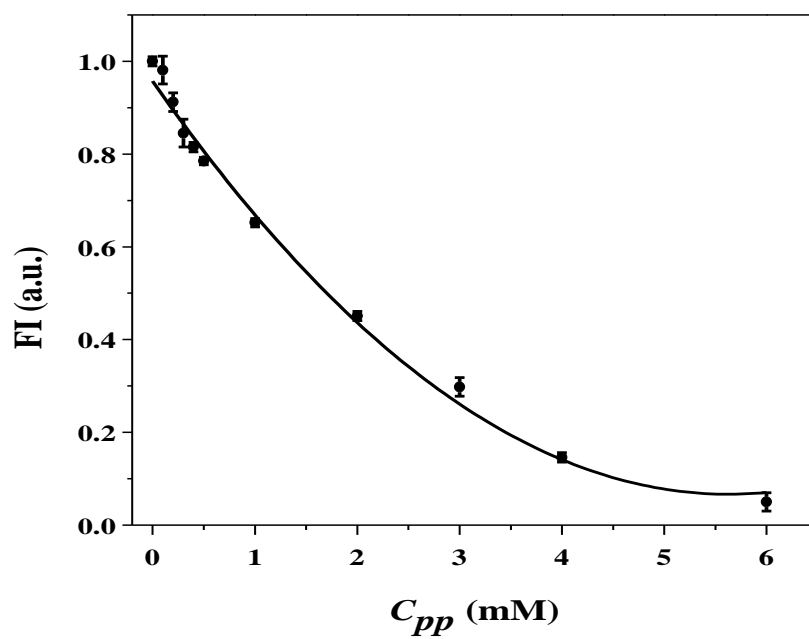

**Figure S8.** Assay of the inhibition of tetrasodium pyrophosphate (PP) on TdT. The inhibitor analysis was conducted by incubation of 400 U/mL TdT with varying concentrations of PP in the presence of 1  $\mu$ M DNA-P and 1 mM dTTP.  $IC_{50} = 1.85$  mM.

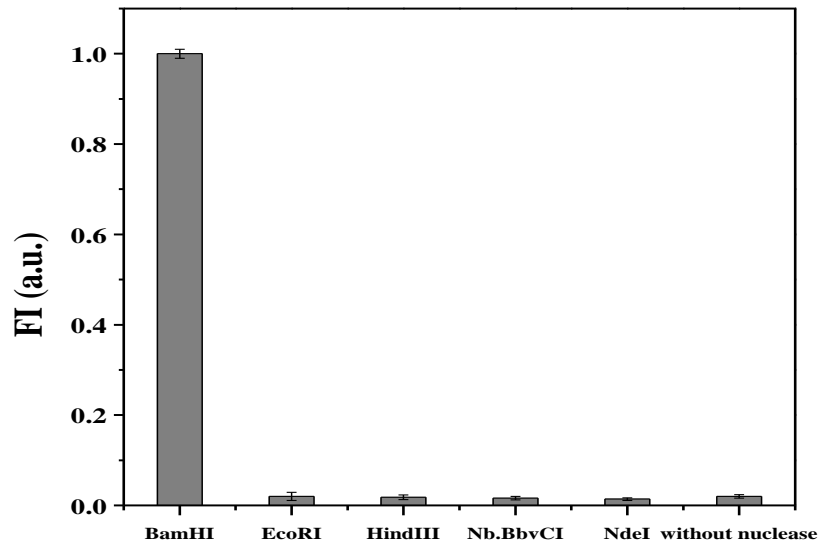

**Figure S9.** The fluorescence responses of the proposed biosensing system based on TdT-generated DNA-CuNPs to BamHI (25 U/mL) and other non-target enzymes. The concentration of non-target enzyme was 120 U/mL.

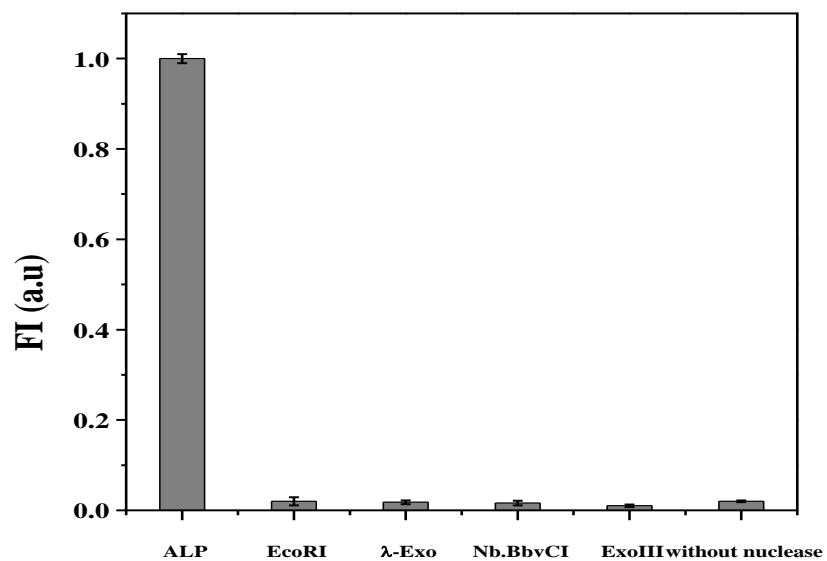

**Figure S10.** The fluorescence responses of the proposed biosensing system based on TdT-generated DNA-CuNPs to ALP (1 U/mL) and other non-target enzymes. The concentration of non-target enzyme was 120 U/mL.
